# Supplementary material for: Contents and yields of copper, iron, manganese and zinc would be affected by lucerne age and cut
Source: PeerJ. 2021 Apr 6;9:e11188. doi: 10.7717/peerj.11188 (PMC8034340; doi:10.7717/peerj.11188)
Supplement: Supplemental Information 1 — Data from five ages, three organs, and three cuts were analyzed. [file peerj-09-11188-s001.xlsx]

## Sheet: Sheet1
						content(mg/kg)				Planting biomass (g/m2)	biomass (g/m2)
Date	cut	planting year	age	organ	repetition	Cu	Fe	Mn	Zn		Cu	Fe	Mn	Zn
2012.6.4	1	2002	11	stem	1	14.7162	359.97	13.0588	26.6198	127.346	1.87406	45.8409	1.66299	3.38993
2012.6.4	1	2002	11	stem	2	16.967	473.423	13.9139	28.3784	157.173	2.66675	74.4094	2.18689	4.46031
2012.6.4	1	2002	11	stem	3	14.3716	363.696	13.1698	25.4382	101.227	1.45478	36.8157	1.33313	2.57502
2012.6.4	1	2005	8	stem	1	18.15	520.55	15.6	61.05	186.343	3.38212	97.0007	2.90695	11.3762
2012.6.4	1	2005	8	stem	2	15.5155	284.985	11.2112	29.5295	160.823	2.49526	45.8322	1.80302	4.74904
2012.6.4	1	2005	8	stem	3	17.2741	270.145	11.5327	35.2971	146.315	2.52745	39.5261	1.6874	5.16447
2012.6.4	1	2008	5	stem	1	6.82388	348.871	16.9092	19.8695	125.073	0.853484	43.6344	2.11488	2.48514
2012.6.4	1	2008	5	stem	2	6.3755	257.028	14.5582	21.1847	106.093	0.676398	27.269	1.54453	2.24756
2012.6.4	1	2008	5	stem	3	6.40767	263.118	14.4803	21.7457	102.046	0.653878	26.8502	1.47766	2.21907
2012.6.4	1	2009	4	stem	1	17.6236	423.764	14.2287	37.0444	159.089	2.80372	67.4164	2.26363	5.89338
2012.6.4	1	2009	4	stem	2	15.95	315.7	14.7	36.85	117.091	1.8676	36.9656	1.72124	4.3148
2012.6.4	1	2009	4	stem	3	19.0334	364.474	15.3961	34.1804	174.68	3.32475	63.6664	2.68939	5.97063
2012.8.12	2	2002	11	stem	1	13.2397	500.1	28.4353	33.9017	125.741	1.66477	62.8829	3.57547	4.26282
2012.8.12	2	2002	11	stem	2	13.0827	906.917	37.0426	31.8296	243.042	3.17964	220.419	9.0029	7.73591
2012.8.12	2	2002	11	stem	3	14.5938	904.012	33.5005	28.8867	251.085	3.66428	226.984	8.41148	7.25301
2012.8.12	2	2005	8	stem	1	13.5432	455.622	24.2379	24.1379	246.976	3.34486	112.528	5.98618	5.9615
2012.8.12	2	2005	8	stem	2	15.7633	308.155	20.2387	20.736	215.33	3.39432	66.3552	4.358	4.46508
2012.8.12	2	2005	8	stem	3	12.5063	474.134	26.9714	13.561	143.699	1.79714	68.1326	3.87576	1.94871
2012.8.12	2	2008	5	stem	1	17.6412	331.934	23.5882	26.2869	180.727	3.18823	59.9893	4.26302	4.75073
2012.8.12	2	2008	5	stem	2	13.6637	207.808	18.2182	36.6366	151.581	2.07115	31.4997	2.76153	5.55342
2012.8.12	2	2008	5	stem	3	14.6196	290.303	18.6474	35.2561	148.525	2.17138	43.1173	2.76961	5.23641
2012.8.12	2	2009	4	stem	1	12.751	483.936	24.6486	25	138.526	1.76635	67.0378	3.41448	3.46315
2012.8.12	2	2009	4	stem	2	13.5338	386.566	26.3659	22.0551	218.893	2.96246	84.6167	5.77131	4.82771
2012.8.12	2	2009	4	stem	3	12.3315	456.965	26.8597	18.7219	170.077	2.09731	77.7192	4.56822	3.18417
2012.8.12	2	2012	1	stem	1	13.4731	751.198	32.7844	28.7425	86.0854	1.15983	64.6671	2.82226	2.47431
2012.8.12	2	2012	1	stem	2	14.4212	643.363	26.1976	26.2475	156.132	2.2516	100.449	4.09028	4.09807
2012.8.12	2	2012	1	stem	3	13.0065	516.958	28.3142	19.5598	124.454	1.61871	64.3376	3.52381	2.4343
2012.10.24	3	2002	11	stem	1	8.56147	1095.27	52.215	31.9562	261.01	2.23463	285.877	13.6287	8.3409
2012.10.24	3	2002	11	stem	2	7.70771	472.673	40.2402	31.0811	158.844	1.22432	75.0811	6.39191	4.93704
2012.10.24	3	2002	11	stem	3	10.4582	496.614	38.1474	29.3327	284.363	2.97392	141.219	10.8477	8.34113
2012.10.24	3	2005	8	stem	1	9.77556	323.292	27.6309	21.7955	180.076	1.76035	58.2172	4.97568	3.92486
2012.10.24	3	2005	8	stem	2	8.79397	382.915	31.407	19.1457	160.033	1.40732	61.2788	5.02615	3.06394
2012.10.24	3	2005	8	stem	3	12.681	507.639	33.2501	27.4089	113.119	1.43446	57.4237	3.76123	3.10047
2012.10.24	3	2008	5	stem	1	22.6861	940.694	47.0322	45.7243	42.3976	0.961836	39.8831	1.99405	1.9386
2012.10.24	3	2008	5	stem	2	24.4344	956.511	46.8577	53.2428	68.7157	1.67903	65.7273	3.21986	3.65862
2012.10.24	3	2008	5	stem	3	22.8543	1018.66	41.9162	49.9002	60.8324	1.39028	61.9677	2.54986	3.03555
2012.10.24	3	2009	4	stem	1	11.5097	1184.95	49.2775	34.0309	233.939	2.69257	277.206	11.5279	7.96114
2012.10.24	3	2009	4	stem	2	12.9146	874.02	42.5126	36.4322	87.7157	1.13281	76.6653	3.72902	3.19567
2012.10.24	3	2009	4	stem	3	19.6127	888.232	42.006	35.6504	147.86	2.89994	131.334	6.21101	5.27128
2012.10.24	3	2012	1	stem	1	22.6161	1319.67	48.6271	90.1648	181.425	4.10313	239.422	8.82217	16.3582
2012.10.24	3	2012	1	stem	2	25.4863	937.257	32.7182	48.2294	142.946	3.64317	133.978	4.67695	6.89423
2012.10.24	3	2012	1	stem	3	21.1	1015.2	34.75	37.1	245.052	5.1706	248.777	8.51555	9.09143
2012.6.4	1	2002	11	root	1	14.8723	744.066	33.8007	30.5458	70.28	1.04523	52.293	2.37551	2.14676
2012.6.4	1	2002	11	root	2	17.0512	751.505	28.7362	22.317	123	2.09729	92.4351	3.53455	2.74498
2012.6.4	1	2002	11	root	3	15.3616	676.658	27.182	25.187	85.08	1.30696	57.5701	2.31265	2.14291
2012.6.4	1	2005	8	root	1	19.2116	1182.53	37.4251	33.8822	299.52	5.75425	354.193	11.2096	10.1484
2012.6.4	1	2005	8	root	2	16.15	865.7	26	32.55	118.52	1.9141	102.603	3.08152	3.85783
2012.6.4	1	2005	8	root	3	15.9681	844.261	29.491	25.3992	204.36	3.26323	172.533	6.02678	5.19058
2012.6.4	1	2008	5	root	1	11.3659	1579.41	50.0997	21.0369	88.12	1.00156	139.178	4.41479	1.85377
2012.6.4	1	2008	5	root	2	12.1878	1664.74	55.3447	21.3287	118.2	1.4406	196.772	6.54174	2.52105
2012.6.4	1	2008	5	root	3	12.3556	1396.99	50.2762	23.3049	41.2	0.509051	57.5558	2.07138	0.960161
2012.6.4	1	2009	4	root	1	20.95	1040.05	36.15	33.65	108.52	2.27349	112.866	3.923	3.6517
2012.6.4	1	2009	4	root	2	17.9142	649.75	21.2575	32.2355	134.12	2.40265	87.1445	2.85105	4.32343
2012.6.4	1	2009	4	root	3	22.5275	790.859	22.5774	37.6623	155.88	3.51158	123.279	3.51937	5.87081
2012.8.12	2	2002	11	root	1	12.2327	767.379	37.5435	19.3933	179.278	2.19305	137.574	6.73072	3.47679
2012.8.12	2	2002	11	root	2	15.7472	795.737	32.4473	15.8475	471.889	7.43095	375.5	15.3115	7.47828
2012.8.12	2	2002	11	root	3	8.88224	572.355	25.4491	14.4711	367.667	3.2657	210.436	9.35679	5.32053
2012.8.12	2	2005	8	root	1	9.37188	449.053	19.5414	11.9641	390.36	3.65841	175.292	7.62817	4.67031
2012.8.12	2	2005	8	root	2	12.1061	625.713	25.1626	12.5563	279.84	3.38776	175.099	7.0415	3.51375
2012.8.12	2	2005	8	root	3	10.9786	728.912	27.2727	13.9096	428.84	4.70808	312.587	11.6956	5.96499
2012.8.12	2	2008	5	root	1	10.9383	459.558	20.8229	11.1892	181.84	1.98902	83.5661	3.78643	2.03464
2012.8.12	2	2008	5	root	2	12.0956	358.785	19.0144	10.1543	97	1.17327	34.8022	1.8444	0.984968
2012.8.12	2	2008	5	root	3	13.4067	509.055	21.1606	12.2561	88.16	1.18193	44.8782	1.86552	1.0805
2012.8.12	2	2009	4	root	1	12.1574	500.648	21.4748	14.5491	129.84	1.57852	65.0041	2.78829	1.88905
2012.8.12	2	2009	4	root	2	14.2068	548.444	22.8414	15.3112	125.64	1.78495	68.9065	2.86979	1.9237
2012.8.12	2	2009	4	root	3	12.5623	477.168	18.7438	13.2602	108.76	1.36628	51.8968	2.03857	1.44218
2012.8.12	2	2012	1	root	1	12.8514	1534.24	40.7631	29.2671	79.8889	1.02668	122.568	3.25651	2.33811
2012.8.12	2	2012	1	root	2	9.7951	924.588	27.0365	25.4373	134.278	1.31526	124.152	3.6304	3.41566
2012.8.12	2	2012	1	root	3	11.9544	1599.85	42.2123	27.5794	84.4444	1.00948	135.099	3.56459	2.32892
2012.10.24	3	2002	11	root	1	7.56595	1227.33	44.7984	34.1961	584.417	4.42167	717.271	26.1809	19.9848
2012.10.24	3	2002	11	root	2	7.43142	907.98	39.3516	35.5112	552.506	4.10591	501.665	21.742	19.6202
2012.10.24	3	2002	11	root	3	8.42528	1083.25	41.324	31.344	708.717	5.97114	767.717	29.287	22.214
2012.10.24	3	2005	8	root	1	5.61122	800.351	32.1643	26.0521	785.987	4.41035	629.065	25.2807	20.4766
2012.10.24	3	2005	8	root	2	7.08899	1051.23	37.1041	21.4178	492.823	3.49362	518.072	18.2858	10.5552
2012.10.24	3	2005	8	root	3	9.4642	685.228	29.3941	29.4942	578.449	5.47455	396.369	17.003	17.0609
2012.10.24	3	2008	5	root	1	20.2899	1307.75	39.0805	30.5347	191.04	3.87617	249.832	7.46593	5.83336
2012.10.24	3	2008	5	root	2	19.2076	1584.25	43.5807	37.011	250.76	4.8165	397.267	10.9283	9.28089
2012.10.24	3	2008	5	root	3	18.9405	1431.73	38.031	31.2844	317.76	6.01854	454.948	12.0847	9.94092
2012.10.24	3	2009	4	root	1	9.28715	1240.11	41.2651	26.4056	249.555	2.31765	309.476	10.2979	6.58965
2012.10.24	3	2009	4	root	2	11.9581	1212.81	44.5441	28.3508	209.289	2.50271	253.826	9.32258	5.9335
2012.10.24	3	2009	4	root	3	9.50951	1520.27	49.7497	27.6777	221.146	2.10299	336.201	11.0019	6.1208
2012.10.24	3	2012	1	root	1	18.9715	685.472	20.3195	31.2531	99.1333	1.88071	67.9531	2.01434	3.09823
2012.10.24	3	2012	1	root	2	21.8734	944.245	23.5177	69.9053	164	3.58724	154.856	3.8569	11.4645
2012.10.24	3	2012	1	root	3	22.5324	1680.41	41.7248	40.3789	245.667	5.53546	412.82	10.2504	9.91974
2012.6.4	1	2002	11	leaf	1	18.7032	454.763	55.0125	42.0948	72.2536	1.35138	32.8583	3.97485	3.0415
2012.6.4	1	2002	11	leaf	2	18.009	465.983	48.8244	39.2196	80.9071	1.45706	37.7013	3.95024	3.17314
2012.6.4	1	2002	11	leaf	3	15.9861	452.54	57.5199	37.8486	64.2133	1.02652	29.0591	3.69355	2.43039
2012.6.4	1	2005	8	leaf	1	19.6304	343.307	56.4436	43.956	128.017	2.51303	43.9492	7.22575	5.62713
2012.6.4	1	2005	8	leaf	2	17.9	431.05	46.3	39.45	109.497	1.95999	47.1986	5.0697	4.31965
2012.6.4	1	2005	8	leaf	3	19.1118	411.178	47.7545	43.1138	117.605	2.24765	48.3567	5.61619	5.07041
2012.6.4	1	2008	5	leaf	1	7.86573	343.387	55.7114	36.9238	49.8667	0.392238	17.1236	2.77814	1.84127
2012.6.4	1	2008	5	leaf	2	10.1247	418.803	63.7905	38.404	55.967	0.566648	23.4391	3.57016	2.14935
2012.6.4	1	2008	5	leaf	3	10.9507	395.669	65.2563	40.1692	40.5938	0.444532	16.0617	2.64901	1.63062
2012.6.4	1	2009	4	leaf	1	24.2137	346.38	47.978	48.0779	75.2306	1.82161	26.0584	3.60941	3.61693
2012.6.4	1	2009	4	leaf	2	20.9476	326.683	48.2793	40.6484	57.0691	1.19546	18.6435	2.75525	2.31976
2012.6.4	1	2009	4	leaf	3	21.6567	417.764	49.501	49.6008	80.32	1.73947	33.5548	3.97592	3.98394
2012.8.12	2	2002	11	leaf	1	13.0696	444.967	60.691	33.8508	76.2038	0.995953	33.9082	4.62489	2.57956
2012.8.12	2	2002	11	leaf	2	14.043	555.572	77.3113	33.0835	166.292	2.33523	92.387	12.8562	5.5015
2012.8.12	2	2002	11	leaf	3	16.0401	598.847	95.188	49.3734	178.581	2.86446	106.943	16.9988	8.81718
2012.8.12	2	2005	8	leaf	1	11.1888	419.381	41.6583	43.5065	77.8636	0.871201	32.6545	3.24367	3.38757
2012.8.12	2	2005	8	leaf	2	13.4905	468.255	52.8586	37.8636	59.0296	0.796338	27.6409	3.12022	2.23507
2012.8.12	2	2005	8	leaf	3	13.2801	483.974	49.8752	33.3	63.6208	0.84489	30.7908	3.1731	2.11858
2012.8.12	2	2008	5	leaf	1	18.607	300.896	71.2935	36.6169	95.3934	1.77498	28.7035	6.80094	3.49301
2012.8.12	2	2008	5	leaf	2	15.8579	278.489	63.0815	26.7634	74.7791	1.18584	20.8252	4.71718	2.00134
2012.8.12	2	2008	5	leaf	3	15.1198	308.533	57.0858	30.6387	78.835	1.19197	24.3232	4.50036	2.4154
2012.8.12	2	2009	4	leaf	1	13.3167	450.175	53.7656	30.4239	72.7538	0.968841	32.7519	3.91165	2.21346
2012.8.12	2	2009	4	leaf	2	12.1137	261.964	49.4018	24.4267	85.0671	1.03047	22.2845	4.20247	2.07791
2012.8.12	2	2009	4	leaf	3	12.9435	420.69	49.3253	24.7376	92.5629	1.19809	38.9403	4.5657	2.28979
2012.8.12	2	2012	1	leaf	1	13.4031	462.531	68.5102	26.3079	92.8035	1.24385	42.9245	6.35799	2.44147
2012.8.12	2	2012	1	leaf	2	13.0827	447.92	52.9825	19.8496	75.3682	0.98602	33.7589	3.99319	1.49603
2012.8.12	2	2012	1	leaf	3	12.5	378.9	54.6	25.45	84.0459	1.05057	31.845	4.5889	2.13897
2012.10.24	3	2002	11	leaf	1	11.9083	1496.91	101.893	48.0817	33.8242	0.40279	50.6319	3.44646	1.62633
2012.10.24	3	2002	11	leaf	2	10.8283	690.12	58.0339	60.3293	61.0288	0.660841	42.1172	3.54174	3.68183
2012.10.24	3	2002	11	leaf	3	15.0025	3365.03	131.209	72.7045	83.5237	1.25306	281.059	10.9591	6.07254
2012.10.24	3	2005	8	leaf	1	11.0224	369.626	92.9676	30.2244	86.1102	0.949145	31.8286	8.00546	2.60263
2012.10.24	3	2005	8	leaf	2	11.9418	1609.58	102.158	59.7592	169.02	2.0184	272.052	17.2667	10.1005
2012.10.24	3	2005	8	leaf	3	10.3448	538.481	70.8646	27.4863	99.7506	1.0319	53.7138	7.06878	2.74177
2012.10.24	3	2008	5	leaf	1	19.5	945.2	83.5	39.5	39.8824	0.777708	37.6969	3.33018	1.57536
2012.10.24	3	2008	5	leaf	2	21.1712	987.638	84.2843	41.2913	55.0443	1.16535	54.3638	4.63937	2.27285
2012.10.24	3	2008	5	leaf	3	21.9267	702.007	61.8665	47.5665	57.6876	1.2649	40.4971	3.56893	2.744
2012.10.24	3	2009	4	leaf	1	11.1056	623.312	61.8809	34.4672	150.42	1.6705	93.7588	9.30816	5.18458
2012.10.24	3	2009	4	leaf	2	9.55956	540.891	60.4104	47.8979	101.44	0.969721	54.8679	6.12803	4.85876
2012.10.24	3	2009	4	leaf	3	10.9172	459.023	72.4327	40.8774	70.8188	0.773146	32.5074	5.1296	2.89489
2012.10.24	3	2012	1	leaf	1	22.2889	746.627	105.597	45.927	83.3748	1.85833	62.2498	8.80414	3.82916
2012.10.24	3	2012	1	leaf	2	21.7936	591.733	66.7836	52.3547	173.654	3.78453	102.757	11.5972	9.09158
2012.10.24	3	2012	1	leaf	3	19.5012	654.813	73.5661	50.7731	349.815	6.82182	229.063	25.7345	17.7612
